# Supplementary material
Source: PubMed Central journal article supplement (PMC5531293)
Supplement: NIHMS878441-supplement-2.pdf [file NIHMS878441-supplement-2.pdf]

## Supplemental Data File. Sweave documentation for microarray data analysis, Related to Figure 2

### Introduction

This supplemental file includes R documentation for microarray analysis. We selected the significant gene list (FDR 0.1) from cell lines by fitting linear regression models on resistant cell line series (H1299 and H1355) using log transformed IC50 values. For xenograft microarray data, we performed student's t test for differential gene analysis with FDR 0.1. 35 genes (14 up regulated and 21 down regulated) were selected from the intersected genes for both cell lines and xenografts. We further tested the 35 gene preclinical signature on 65 patients who had received neoadjuvant chemotherapy. Unsupervised clustering using 35 genes separated the 65 patients into two groups. K-M curve for recurrence-free survival analysis showed that group 2 has significantly worse prognosis. Multivariate cox regression model for the 35 genes showed that the up-regulated gene **KDM3B** has the largest hazard ratio for poor cancer recurrence-free survival.

Microarray data were pre-processed by R package mbcB for background correction, then log-transformed and quantile-normalized with the R package preprocessCore. We summarized the gene-level expression by averaging the normalized probes intensity value if multiple probes mapped to the same gene.

Before running the code, put the data in the same folder with the code.

### Statistics Analysis

#### H1299 and H1355 linear regression model

1. set the working environment and call the library package  
setwd("~/Documents/YY\_Project/maithili/SWEAVE/")

```
library(ClassComparison)
## Loading required package: splines
## Loading required package: Biobase
## Loading required package: BiocGenerics
## Loading required package: parallel
##
## Attaching package: 'BiocGenerics'
## The following objects are masked from 'package:parallel':
##
```

```
##      clusterApply, clusterApplyLB, clusterCall, clusterEvalQ,  
##      clusterExport, clusterMap, parApply, parCapply, parLapply,  
##      parLapplyLB, parRapply, parSapply, parSapplyLB  
  
## The following objects are masked from 'package:stats':  
##  
##      IQR, mad, xtabs  
  
## The following objects are masked from 'package:base':  
##  
##      anyDuplicated, append, as.data.frame, as.vector, cbind,  
##      colnames, do.call, duplicated, eval, evalq, Filter, Find, get,  
##      grep, grepl, intersect, is.unsorted, lapply, lengths, Map,  
##      mapply, match, mget, order, paste, pmax, pmax.int, pmin,  
##      pmin.int, Position, rank, rbind, Reduce, rownames, sapply,  
##      setdiff, sort, table, tapply, union, unique, unlist, unsplit  
  
## Welcome to Bioconductor  
##  
##      Vignettes contain introductory material; view with  
##      'browseVignettes()'. To cite Bioconductor, see  
##      'citation("Biobase)", and for packages 'citation("pkgname)".  
  
## Loading required package: oompaBase  
  
library(survival)  
library(VennDiagram)  
  
## Loading required package: grid  
  
## Loading required package: futile.logger  
  
library(siggenes)  
  
## Loading required package: multtest  
  
library(gplots)  
  
##  
## Attaching package: 'gplots'  
  
## The following object is masked from 'package:multtest':  
##  
##      wapply  
  
## The following object is masked from 'package:oompaBase':  
##  
##      redgreen  
  
## The following object is masked from 'package:stats':  
##  
##      lowess
```

2. Load normalized gene level expression data (preprocess procedure described in the method)

```
load("cell_line.RData")
```

3. run core function/analysis for H1299 Linear regression model for microarray at different time series with log transformed drug responses data IC 50.

```
# IC 50
ic50=c(rep(9.2, 5), rep(53, 2), rep(190, 2), rep(490, 2), rep(943, 3))
ic50=log(ic50) # Log transform, otherwise est is too big.

# Linear function
lm.ic=function(x){
  x=as.numeric(x)
  lm.x=lm(x~ic50)
  lm.co=summary(lm.x)$coefficients
  return(t(c(lm.co[2, 1], lm.co[2, 4])))
}

dim(df.1299)
## [1] 20549 19

head(df.1299[,1:5])
##   gene.id n gene.symbol H1299.Parental.1 H1299.Parental.2
## 1      1 2      A1BG          3.538114          3.530899
## 2      2 1      A2M          2.623364          3.244314
## 3      9 3      NAT1          3.791201          3.896611
## 4     10 1      NAT2          2.965261          3.086720
## 5     12 1  SERPINA3          2.933633          3.332563
## 6     13 1      AADAC          2.845070          3.086720

colnames(df.1299)
## [1] "gene.id"          "n"                "gene.symbol"
## [4] "H1299.Parental.1" "H1299.Parental.2" "H1299.Parental.3"
## [7] "H1299.Untr.1"     "H1299.Untr.2"     "H1299.T5.1"
## [10] "H1299.T5.2"       "H1299.T10.1"      "H1299.T10.2"
## [13] "H1299.T15.1"      "H1299.T15.2"      "H1299.T18.1"
## [16] "H1299.T18.2"      "H1299.T18.3"      "est"
## [19] "p.value"

apply(df.1299[1:5, cell.1299], 1, lm.ic)
##           1           2           3           4           5
## [1,] -0.005878157 -0.04970737 -0.166829025 0.008405362 0.79070808
## [2,] 0.884844954 0.20710959 0.003930657 0.826502466 0.00106438

est=apply(df.1299[, cell.1299], 1, lm.ic)
est=t(est)
```

```

est=data.frame(est)
head(est)

##           X1           X2
## 1 -0.005878157 0.884844954
## 2 -0.049707375 0.207109593
## 3 -0.166829025 0.003930657
## 4  0.008405362 0.826502466
## 5  0.790708076 0.001064380
## 6  0.057528835 0.283359856

names(est)=c("est", "p.value")
head(est)

##           est           p.value
## 1 -0.005878157 0.884844954
## 2 -0.049707375 0.207109593
## 3 -0.166829025 0.003930657
## 4  0.008405362 0.826502466
## 5  0.790708076 0.001064380
## 6  0.057528835 0.283359856

df.1299=cbind(df.1299, est)

fdr=0.1
p.1299=cutoffSignificant(Bum(df.1299$p.value), fdr)
p.1299

## [1] 0.02927903

table(df.1299$p.value < p.1299)

##
## FALSE  TRUE
## 16797  3752

table(df.1299$p.value < p.1299 & df.1299$est < 0)

##
## FALSE  TRUE
## 18673  1876

table(df.1299$p.value < p.1299 & df.1299$est > 0)

##
## FALSE  TRUE
## 18673  1876

id.up.1299=df.1299$gene.id[df.1299$p.value < p.1299 & df.1299$est > 0]
id.down.1299=df.1299$gene.id[df.1299$p.value < p.1299 & df.1299$est < 0]
# volcano plot: p valu only
par(mar=c(5, 5, 2, 1))
plot(df.1299$est, -log10(df.1299$p.value), xlab="Est of coefficients",

```

```

cex=0.5,
  ylab="P value (-log10)", cex.lab=2, cex.axis=1.5, bty="n", col="blue",
pch=20,
  yaxt="n")
axis(2, at=c(0, 2, 4, 6, 8), labels=c(1, 0.01, 0.0001, 0.000001, 0.00000001),
cex.axis=1.5)
points(df.1299$est[df.1299$p.value < p.1299 & df.1299$est > 0],
  -log10(df.1299$p.value[df.1299$p.value < p.1299 & df.1299$est > 0]),
col="red",
  pch=20)
points(df.1299$est[df.1299$p.value < p.1299 & df.1299$est < 0],
  -log10(df.1299$p.value[df.1299$p.value < p.1299 & df.1299$est < 0]),
col="green",
  pch=20)
table(df.1299$p.value < p.1299 & df.1299$est > 0)

##
## FALSE TRUE
## 18673 1876

table(df.1299$p.value < p.1299 & df.1299$est < 0)

##
## FALSE TRUE
## 18673 1876

legend("topleft", c("Upregulated: 1876", "Downregulated: 1876"),
  col=c("red", "green"), pch=20, bty="n")

```

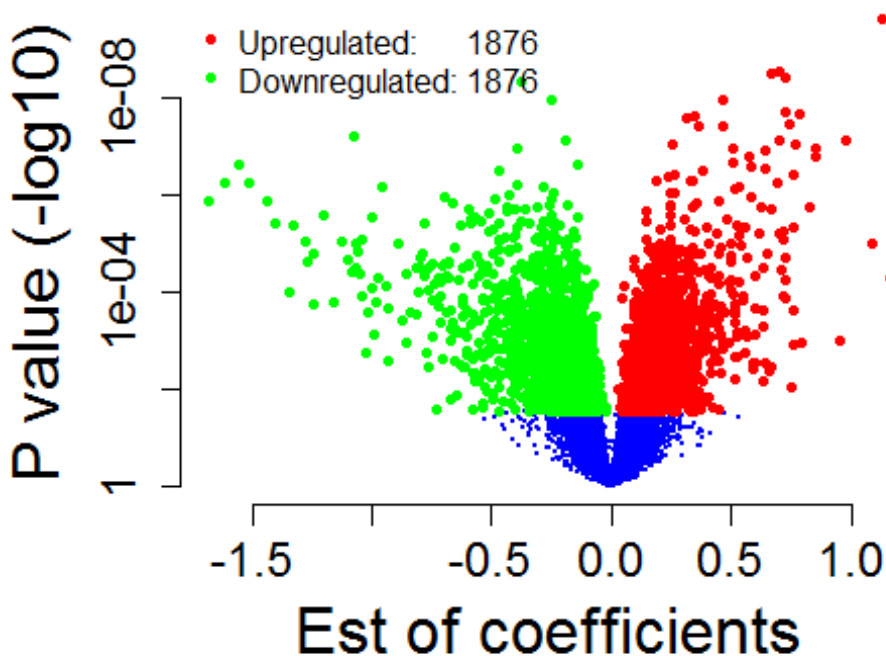

#### 4. run core function/analysis for H1355

```
# IC 50
ic50=c(rep(2.2, 5), rep(15, 2), rep(25, 2), rep(245, 2), rep(315, 3))
ic50=log(ic50) # Log transform, otherwise est is too big.
# significant p values will enrich.
ic50

## [1] 0.7884574 0.7884574 0.7884574 0.7884574 0.7884574 2.7080502 2.7080502
## [8] 3.2188758 3.2188758 5.5012582 5.5012582 5.7525726 5.7525726 5.7525726

# Linear function
dim(df.1355)

## [1] 20549 19

head(df.1355[,1:5])

## gene.id n gene.symbol H1355.Parental.1 H1355.Parental.2
## 1 1 2 A1BG 3.980461 3.570940
## 2 2 1 A2M 2.705274 2.888426
## 3 9 3 NAT1 4.303963 3.966284
## 4 10 1 NAT2 3.796795 3.593245
## 5 12 1 SERPINA3 3.229223 3.493975
## 6 13 1 AADAC 4.967962 5.713092

colnames(df.1355)

## [1] "gene.id" "n" "gene.symbol"
## [4] "H1355.Parental.1" "H1355.Parental.2" "H1355.Parental.3"
## [7] "H1355.Untr.1" "H1355.Untr.2" "H1355.T4.1"
## [10] "H1355.T4.2" "H1355.T8.1" "H1355.T8.2"
## [13] "H1355.T13.1" "H1355.T13.2" "H1355.T16.1"
## [16] "H1355.T16.2" "H1355.T16.3" "est"
## [19] "p.value"

est=apply(df.1355[, cell.1355], 1, lm.ic)
est=t(est)
est=data.frame(est)
head(est)

## X1 X2
## 1 0.02633836 0.4573952245
## 2 -0.03237285 0.1441376047
## 3 0.28051951 0.0004062189
## 4 -0.13380885 0.0753998578
## 5 -0.05697809 0.2763634625
## 6 0.14990967 0.2601679463

names(est)=c("est", "p.value")
head(est)
```

```

##           est           p.value
## 1  0.02633836 0.4573952245
## 2 -0.03237285 0.1441376047
## 3  0.28051951 0.0004062189
## 4 -0.13380885 0.0753998578
## 5 -0.05697809 0.2763634625
## 6  0.14990967 0.2601679463

df.1355=cbind(df.1355, est)

p.1355=cutoffSignificant(Bum(df.1355$p.value), fdr)
p.1355

## [1] 0.003536239

table(df.1355$p.value < p.1355)

##
## FALSE TRUE
## 19954  595

table(df.1355$p.value < p.1355 & df.1355$est < 0)

##
## FALSE TRUE
## 20259  290

table(df.1355$p.value < p.1355 & df.1355$est > 0)

##
## FALSE TRUE
## 20244  305

id.up.1355=df.1355$gene.id[df.1355$p.value < p.1355 & df.1355$est > 0]
id.down.1355=df.1355$gene.id[df.1355$p.value < p.1355 & df.1355$est < 0]
sum(id.up.1355 %in% id.up.1299)

## [1] 51

sum(id.down.1355 %in% id.down.1299)

## [1] 59

par(mar=c(5, 5, 2, 1))
plot(df.1355$est, -log10(df.1355$p.value), xlab="Est of coefficients",
cex=0.5,
      ylab="P value (-log10)", cex.lab=2, cex.axis=1.5, bty="n", col="blue",
pch=20,
      yaxt="n")
axis(2, at=c(0, 2, 4, 6, 8), labels=c(1, 0.01, 0.0001, 0.000001, 0.00000001),
cex.axis=1.5)
points(df.1355$est[df.1355$p.value < p.1355 & df.1355$est > 0],
      -log10(df.1355$p.value[df.1355$p.value < p.1355 & df.1355$est > 0]),

```

```

col="red",
  pch=20)
points(df.1355$est[df.1355$p.value < p.1355 & df.1355$est < 0],
  -log10(df.1355$p.value[df.1355$p.value < p.1355 & df.1355$est < 0]),
col="green",
  pch=20)
table(df.1355$p.value < p.1355 & df.1355$est > 0)

##
## FALSE TRUE
## 20244 305

table(df.1355$p.value < p.1355 & df.1355$est < 0)

##
## FALSE TRUE
## 20259 290

legend("topleft", c("Upregulated: 305", "Downregulated: 290"),
  col=c("red", "green"), pch=20, bty="n")

```

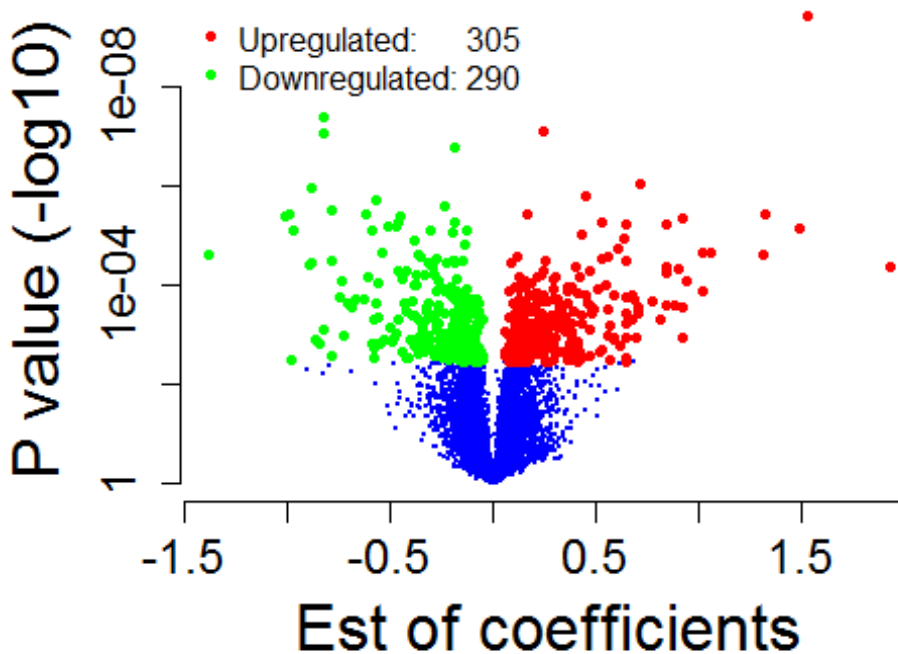

5. venn diagramm for H1299 and H1355 intersected up and down regulated genes.

```

# upregulated
sum(df.1299$p.value < p.1299 & df.1299$est > 0)

## [1] 1876

sum(df.1355$p.value < p.1355 & df.1355$est > 0)

```



```
## [1] 305
sum((df.1299$p.value < p.1299 & df.1299$est > 0) &
     (df.1355$p.value < p.1355 & df.1355$est > 0))
## [1] 51
plot.new()
draw.pairwise.venn(1876, 305, 51, cex=3,
                   fill=c("purple", "blue"), lty="blank")
```

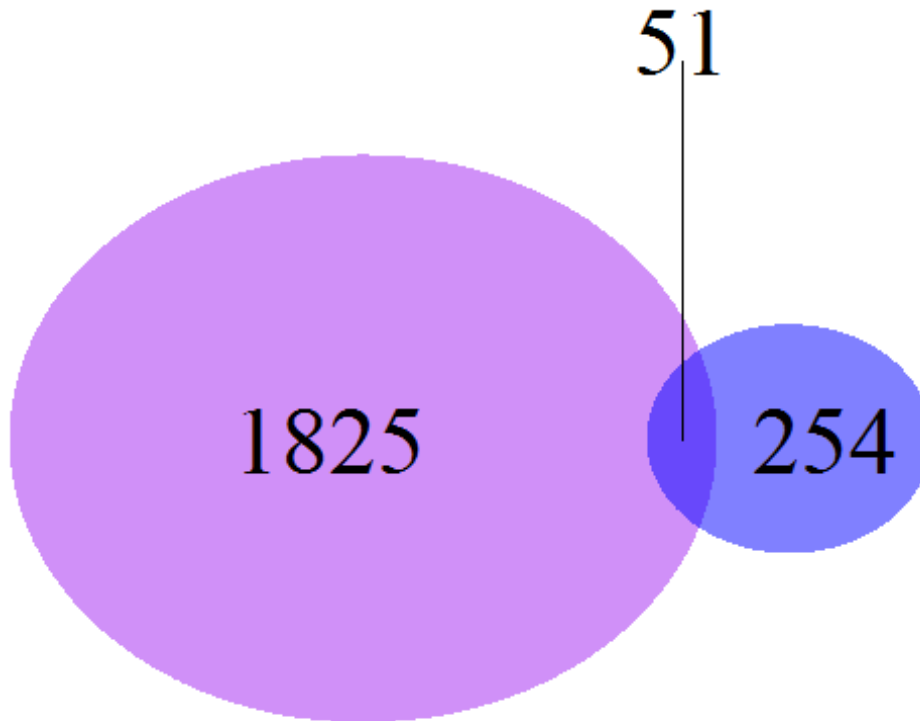

```
## (polygon[GRID.polygon.1], polygon[GRID.polygon.2],
polygon[GRID.polygon.3], polygon[GRID.polygon.4], text[GRID.text.5],
text[GRID.text.6], text[GRID.text.7], lines[GRID.lines.8], text[GRID.text.9],
text[GRID.text.10])

## (polygon[GRID.polygon.1], polygon[GRID.polygon.2],
polygon[GRID.polygon.3], polygon[GRID.polygon.4], text[GRID.text.5],
text[GRID.text.6], text[GRID.text.7], lines[GRID.lines.8], text[GRID.text.9],
text[GRID.text.10])
# down regulated
sum(df.1299$p.value < p.1299 & df.1299$est < 0)
## [1] 1876
sum(df.1355$p.value < p.1355 & df.1355$est < 0)
## [1] 290
```

```

sum((df.1299$p.value < p.1299 & df.1299$est < 0) &
     (df.1355$p.value < p.1355 & df.1355$est < 0))

## [1] 59

plot.new()
draw.pairwise.venn(1876, 290, 59, cex=3,
                   fill=c("purple", "blue"), lty="blank")

```

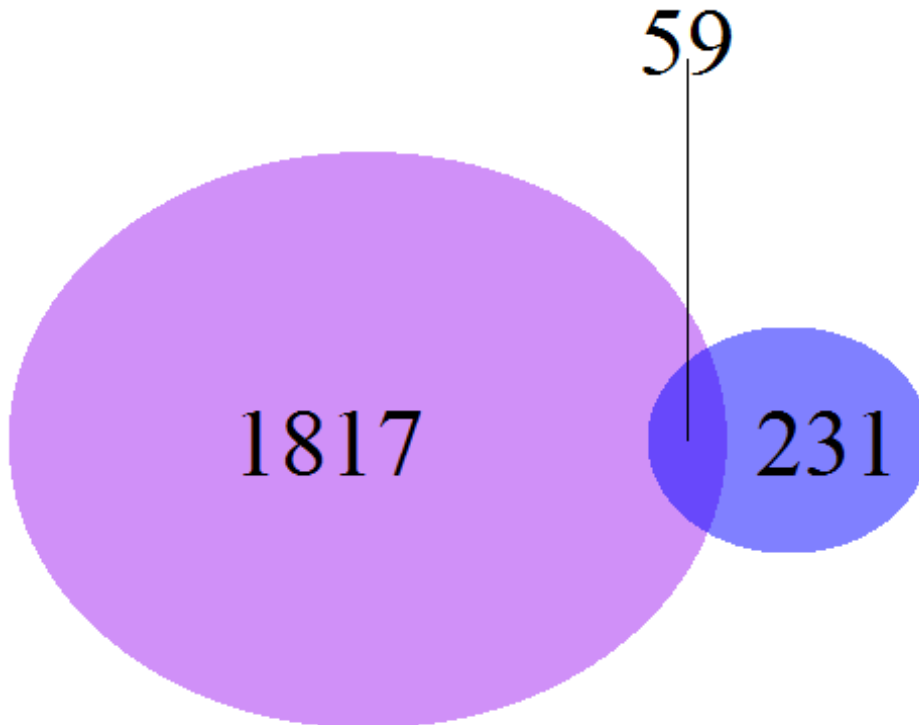

```

## (polygon[GRID.polygon.11], polygon[GRID.polygon.12],
polygon[GRID.polygon.13], polygon[GRID.polygon.14], text[GRID.text.15],
text[GRID.text.16], text[GRID.text.17], lines[GRID.lines.18],
text[GRID.text.19], text[GRID.text.20])

## (polygon[GRID.polygon.11], polygon[GRID.polygon.12],
polygon[GRID.polygon.13], polygon[GRID.polygon.14], text[GRID.text.15],
text[GRID.text.16], text[GRID.text.17], lines[GRID.lines.18],
text[GRID.text.19], text[GRID.text.20])

```

## Xenografts

1. load the xenograft data

```

load("xeno.RData")
head(df.xeno[,1:5])

##   gene.id n gene.symbol H1299.Parental.Cis+Doc.871
## 1     1 2     A1BG          3.633839
## 2     2 1     A2M          2.229475

```

```
## 3      9 3      NAT1      3.012080
## 4     10 1      NAT2      2.419627
## 5     12 1  SERPINA3      5.481228
## 6     13 1    AADAC      2.488485
##  H1299.Parental.Cis+Doc.873
## 1              3.136163
## 2              1.674401
## 3              3.092054
## 4              2.585305
## 5              7.112472
## 6              2.548242
```

```
dim(df.xeno)
```

```
## [1] 20549    15
```

```
colnames(df.xeno)
```

```
## [1] "gene.id"      "n"
## [3] "gene.symbol"  "H1299.Parental.Cis+Doc.871"
## [5] "H1299.Parental.Cis+Doc.873" "H1299.Parental.Cis+Doc.878"
## [7] "H1299.Parental.Saline.872" "H1299.Parental.Saline.877"
## [9] "H1299.Parental.Saline.891" "H1299.T18.Cis+Doc.868"
## [11] "H1299.T18.Cis+Doc.882" "H1299.T18.Cis+Doc.889"
## [13] "H1299.T18.Saline.862" "H1299.T18.Saline.870"
## [15] "H1299.T18.Saline.886"
```

```
xeno.line
```

```
## [1] "H1299.Parental.Cis+Doc.871" "H1299.Parental.Cis+Doc.873"
## [3] "H1299.Parental.Cis+Doc.878" "H1299.Parental.Saline.872"
## [5] "H1299.Parental.Saline.877" "H1299.Parental.Saline.891"
## [7] "H1299.T18.Cis+Doc.868" "H1299.T18.Cis+Doc.882"
## [9] "H1299.T18.Cis+Doc.889" "H1299.T18.Saline.862"
## [11] "H1299.T18.Saline.870" "H1299.T18.Saline.886"
```

```
id.up=df.1299$gene.id[df.1299$p.value < p.1299 & df.1299$est > 0 &
df.1355$p.value < p.1355 & df.1355$est > 0]
```

```
id.down=df.1299$gene.id[df.1299$p.value < p.1299 & df.1299$est < 0 &
df.1355$p.value < p.1355 & df.1355$est < 0]
```

## 2. significant differential expression gene analysis (FDR 0.1)

```
xeno.untr=xeno.line[c(4:6, 10:12)]
```

```
xeno.untr
```

```
## [1] "H1299.Parental.Saline.872" "H1299.Parental.Saline.877"
## [3] "H1299.Parental.Saline.891" "H1299.T18.Saline.862"
## [5] "H1299.T18.Saline.870" "H1299.T18.Saline.886"
```

```
head(df.xeno)
```

```

## gene.id n gene.symbol H1299.Parental.Cis+Doc.871
## 1 1 2 A1BG 3.633839
## 2 2 1 A2M 2.229475
## 3 9 3 NAT1 3.012080
## 4 10 1 NAT2 2.419627
## 5 12 1 SERPINA3 5.481228
## 6 13 1 AADAC 2.488485
## H1299.Parental.Cis+Doc.873 H1299.Parental.Cis+Doc.878
## 1 3.136163 2.745621
## 2 1.674401 1.610231
## 3 3.092054 2.863332
## 4 2.585305 2.481384
## 5 7.112472 5.059355
## 6 2.548242 3.361560
## H1299.Parental.Saline.872 H1299.Parental.Saline.877
## 1 3.536566 2.910598
## 2 2.307369 1.766422
## 3 3.045042 2.973530
## 4 2.596068 3.350789
## 5 2.822787 6.649452
## 6 3.526960 2.935540
## H1299.Parental.Saline.891 H1299.T18.Cis+Doc.868 H1299.T18.Cis+Doc.882
## 1 3.209863 3.693003 3.064912
## 2 1.827652 2.748023 2.080255
## 3 3.317923 2.552347 2.659500
## 4 2.897194 2.441063 2.553360
## 5 3.574117 10.439048 11.141053
## 6 2.858179 2.535265 2.235517
## H1299.T18.Cis+Doc.889 H1299.T18.Saline.862 H1299.T18.Saline.870
## 1 3.453592 3.537467 3.438834
## 2 2.221931 1.940983 2.200645
## 3 2.819919 2.557727 2.305327
## 4 2.247488 2.308160 1.967581
## 5 11.685980 12.776207 12.126267
## 6 3.207945 2.885458 3.018145
## H1299.T18.Saline.886
## 1 3.450917
## 2 1.727244
## 3 2.749388
## 4 2.017007
## 5 11.371214
## 6 2.583509

```

```

dat.validate=df.xeno[, c("gene.id", "n", "gene.symbol", xeno.untr)]
head(dat.validate)

```

```

## gene.id n gene.symbol H1299.Parental.Saline.872
## 1 1 2 A1BG 3.536566
## 2 2 1 A2M 2.307369
## 3 9 3 NAT1 3.045042

```

```

## 4      10 1      NAT2                2.596068
## 5      12 1     SERPINA3             2.822787
## 6      13 1     AADAC                3.526960
##   H1299.Parental.Saline.877 H1299.Parental.Saline.891 H1299.T18.Saline.862
## 1                2.910598                3.209863                3.537467
## 2                1.766422                1.827652                1.940983
## 3                2.973530                3.317923                2.557727
## 4                3.350789                2.897194                2.308160
## 5                6.649452                3.574117                12.776207
## 6                2.935540                2.858179                2.885458
##   H1299.T18.Saline.870 H1299.T18.Saline.886
## 1                3.438834                3.450917
## 2                2.200645                1.727244
## 3                2.305327                2.749388
## 4                1.967581                2.017007
## 5                12.126267                11.371214
## 6                3.018145                2.583509

dat.validate$fold.change=apply(dat.validate[,7:9], 1, mean)-
apply(dat.validate[, 4:6], 1, mean)

xeno.p=function(x){
  x=as.numeric(x)
  return(t.test(x[1:3], x[4:6], alternative="two.sided")$p.value)
}
xeno.p(dat.validate[1, 4:9])

## [1] 0.2900682

dat.validate$p.value=apply(dat.validate[, 4:9], 1, xeno.p)

```

## Gene signatures

1. Venn diagram up and down regulated genes for both cell lines and xenografts

```

#venn diagram
p.xeno=cutoffSignificant(Bum(dat.validate$p.value), 0.1)
p.xeno

## [1] 0.01136181

table(dat.validate$p.value < p.xeno)

##
## FALSE TRUE
## 19178 1371

id.up.xeno=dat.validate$gene.id[dat.validate$p.value < p.xeno &
dat.validate$fold.change > 0]

length(id.up)

## [1] 51

```

```

length(id.up.xeno)
## [1] 646
sum(id.up %in% id.up.xeno)
## [1] 14
plot.new()
draw.pairwise.venn(646, 51, 14, cex=3,
  fill=c("light blue", "light green"), lty="blank")

```

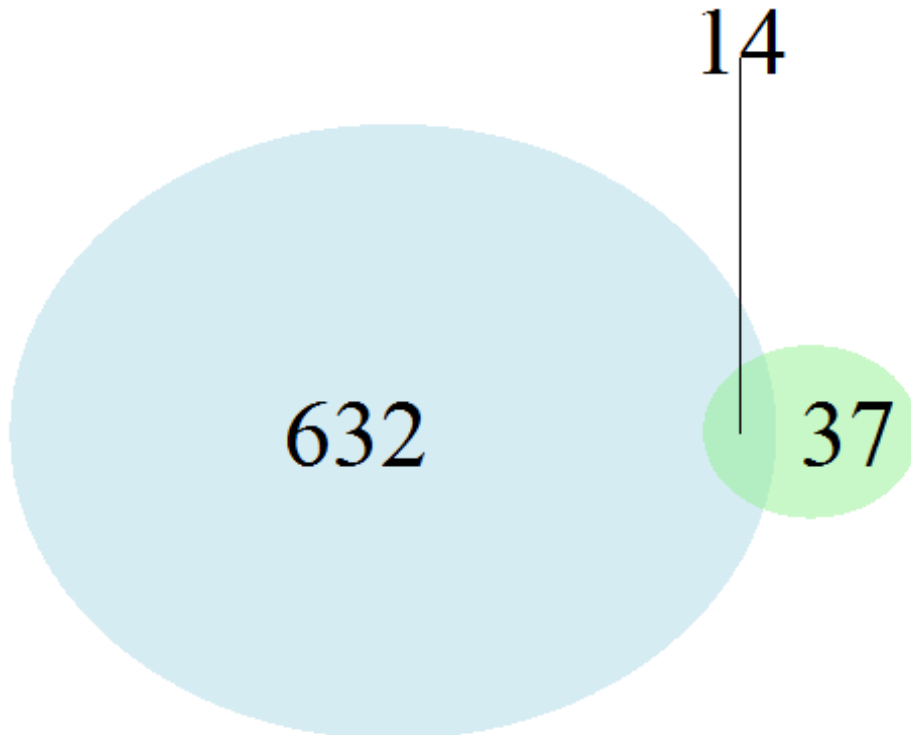

```

## (polygon[GRID.polygon.21], polygon[GRID.polygon.22],
polygon[GRID.polygon.23], polygon[GRID.polygon.24], text[GRID.text.25],
text[GRID.text.26], text[GRID.text.27], lines[GRID.lines.28],
text[GRID.text.29], text[GRID.text.30])

## (polygon[GRID.polygon.21], polygon[GRID.polygon.22],
polygon[GRID.polygon.23], polygon[GRID.polygon.24], text[GRID.text.25],
text[GRID.text.26], text[GRID.text.27], lines[GRID.lines.28],
text[GRID.text.29], text[GRID.text.30])
id.down.xeno=dat.validate$gene.id[dat.validate$p.value < p.xeno &
  dat.validate$fold.change < 0]
length(id.down)
## [1] 59
length(id.down.xeno)

```

```
## [1] 725
sum(id.down %in% id.down.xeno)
## [1] 21
plot.new()
draw.pairwise.venn(725, 59, 21, cex=3,
  fill=c("light blue", "light green"), lty="blank")
```

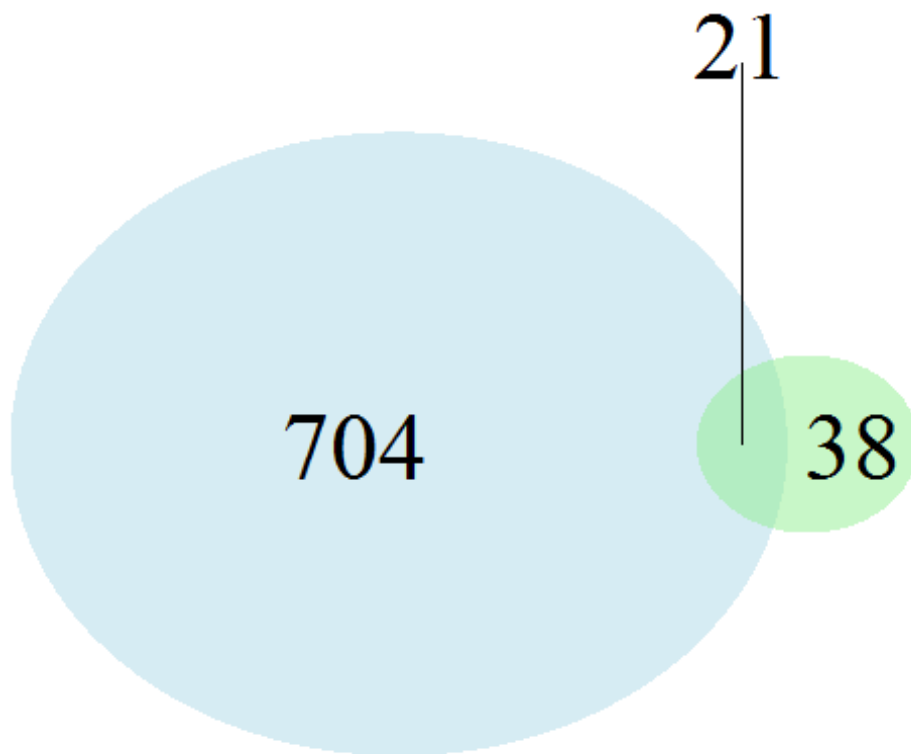

```
## (polygon[GRID.polygon.31], polygon[GRID.polygon.32],
polygon[GRID.polygon.33], polygon[GRID.polygon.34], text[GRID.text.35],
text[GRID.text.36], text[GRID.text.37], lines[GRID.lines.38],
text[GRID.text.39], text[GRID.text.40])

## (polygon[GRID.polygon.31], polygon[GRID.polygon.32],
polygon[GRID.polygon.33], polygon[GRID.polygon.34], text[GRID.text.35],
text[GRID.text.36], text[GRID.text.37], lines[GRID.lines.38],
text[GRID.text.39], text[GRID.text.40])
id.up.regulate=id.up[id.up %in% id.up.xeno]
id.down.regulate=id.down[id.down %in% id.down.xeno]
sig.gene=dat.validate[dat.validate$gene.id %in%
c(id.up.regulate,id.down.regulate),c("gene.id", "gene.symbol")]
gene35=as.character(sig.gene$gene.symbol)
up=dat.validate[dat.validate$gene.id %in% id.up.regulate,c("gene.id",
"gene.symbol")]
```

2.xenografts vocano plot

```

par(mar=c(5, 5, 2, 1))
plot(dat.validate$fold.change, -log10(dat.validate$p.value), xlab="Fold
Change", cex=0.5,
      ylab="P value (-log10)", cex.lab=2, cex.axis=1.5, bty="n", col="blue",
pch=20,
      yaxt="n")
axis(2, at=c(0, 2, 4, 6, 8), labels=c(1, 0.01, 0.0001, 0.000001, 0.00000001),
cex.axis=1.5)
points(dat.validate$fold.change[dat.validate$p.value < p.xeno &
dat.validate$fold.change > 0],
       -log10(dat.validate$p.value[dat.validate$p.value < p.xeno &
dat.validate$fold.change > 0]), col="red",
       pch=20)
points(dat.validate$fold.change[dat.validate$p.value < p.xeno &
dat.validate$fold.change < 0],
       -log10(dat.validate$p.value[dat.validate$p.value < p.xeno &
dat.validate$fold.change < 0]), col="green",
       pch=20)
table(dat.validate$p.value < p.xeno & dat.validate$fold.change > 0)

##
## FALSE TRUE
## 19903 646

table(dat.validate$p.value < p.xeno & dat.validate$fold.change < 0)

##
## FALSE TRUE
## 19824 725

legend("bottomleft", c("Upregulated: 646", "Downregulated: 725"),
      col=c("red", "green"), pch=20, bty="n")

```



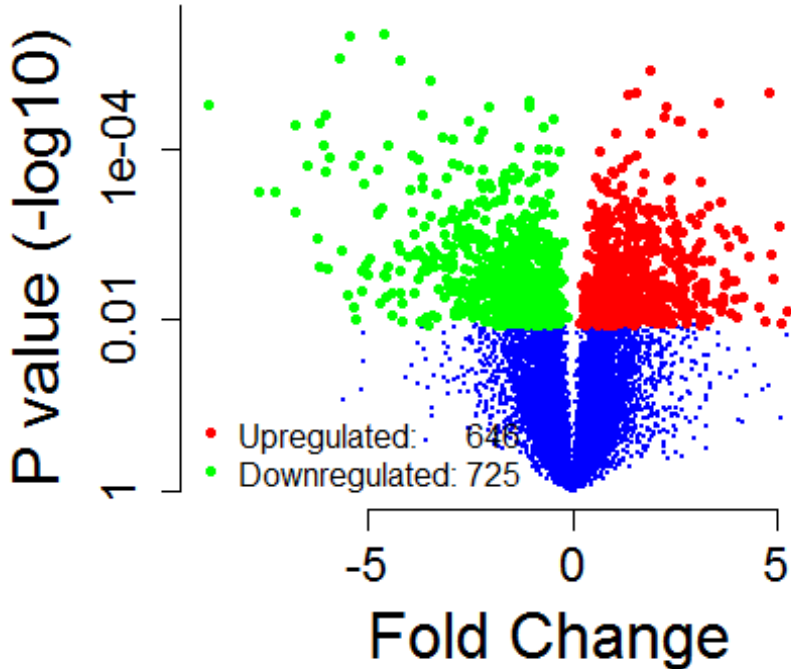

3. heatmaps for 35 significance gene signature in Cell lines H1355,H1299 and Xenografts

```
# Load 35 genes signature
```

```
xeno <- read.table("xenografts.txt",sep="\t",head=TRUE)
CL <- read.table("cellLines.txt",sep="\t",head=TRUE)
```

```
# In xenografts, select probes with largest absolute Fold change to represent the genes expression
```

```
xeno35 <- xeno[xeno$Symbol %in% gene35,]
dat <- NULL
```

```
for (id in unique(xeno35$Symbol)){
  tmp <- xeno35[xeno35$Symbol %in% id,]
  if (nrow(tmp)>1){

    mm =
tmp[tmp$H1299.T18.vs.H1299.P==max(abs(tmp$H1299.T18.vs.H1299.P))|tmp$H1299.T18.vs.H1299.P==min(abs(tmp$H1299.T18.vs.H1299.P)) ,]
    dat <- rbind(dat,mm)

  } else {
    dat=rbind(dat,tmp)
  }
}
```

```

}
xe <- dat[,10:21]
rownames(xe) <- dat$Symbol
xe=as.matrix(xe)
xe=xe[,c(1,2,3,7,8,9)]

#####
# In cell lines, select probes with largest absolute Fold change to represent
the genes expression

# cell lines
CL35 <- CL[CL$Symbol %in% gene35,]
CL35.H1355 <-
data.frame(Symbol=CL35$Symbol,ProbeID=CL35$Probe.ID,CL35[,grep("H1355",colnames(CL35))])
CL35.H1299 <-
data.frame(Symbol=CL35$Symbol,ProbeID=CL35$Probe.ID,CL35[,grep("H1299",colnames(CL35))])
H1355.dat <- NULL

for (id in unique(CL35.H1355$Symbol)){
  tmp <- CL35.H1355[CL35.H1355$Symbol %in% id,]
  if (nrow(tmp)>1){

    mm =
tmp[tmp$H1355.T16.vs.H1355.P==max(abs(tmp$H1355.T16.vs.H1355.P))|tmp$H1355.T16.vs.H1355.P==
-min(abs(tmp$H1355.T16.vs.H1355.P)) ,]
    H1355.dat <- rbind(H1355.dat,mm)

  } else {
    H1355.dat=rbind(H1355.dat,tmp)
  }
}

H1355.cb <- as.matrix(H1355.dat[,4:17])
rownames(H1355.cb) <- as.character(H1355.dat$Symbol)

H1299.dat <- NULL

for (id in unique(CL35.H1299$Symbol)){
  tmp <- CL35.H1299[CL35.H1299$Symbol %in% id,]
  if (nrow(tmp)>1){

    mm =
tmp[tmp$H1299.T18.vs.H1299.P==max(abs(tmp$H1299.T18.vs.H1299.P))|tmp$H1299.T18.vs.H1299.P==
-min(abs(tmp$H1299.T18.vs.H1299.P)) ,]
  }
}

```

```

H1299.dat <- rbind(H1299.dat,mm)

} else {
  H1299.dat=rbind(H1299.dat,tmp)
}
}
H1299.cb <- as.matrix(H1299.dat[,4:17])
rownames(H1299.cb) <- H1299.dat$Symbol

# heatmaps

mm=heatmap.2(xe, col=greenred, scale="row",distfun=function(x) {as.dist(1-
cor(t(x)))},tracecol=NULL,,Colv=FALSE,key=FALSE)

## Warning in heatmap.2(xe, col = greenred, scale = "row", distfun =
## function(x) {: Discrepancy: Colv is FALSE, while dendrogram is `row`.
## Omitting column dendrogram.

```

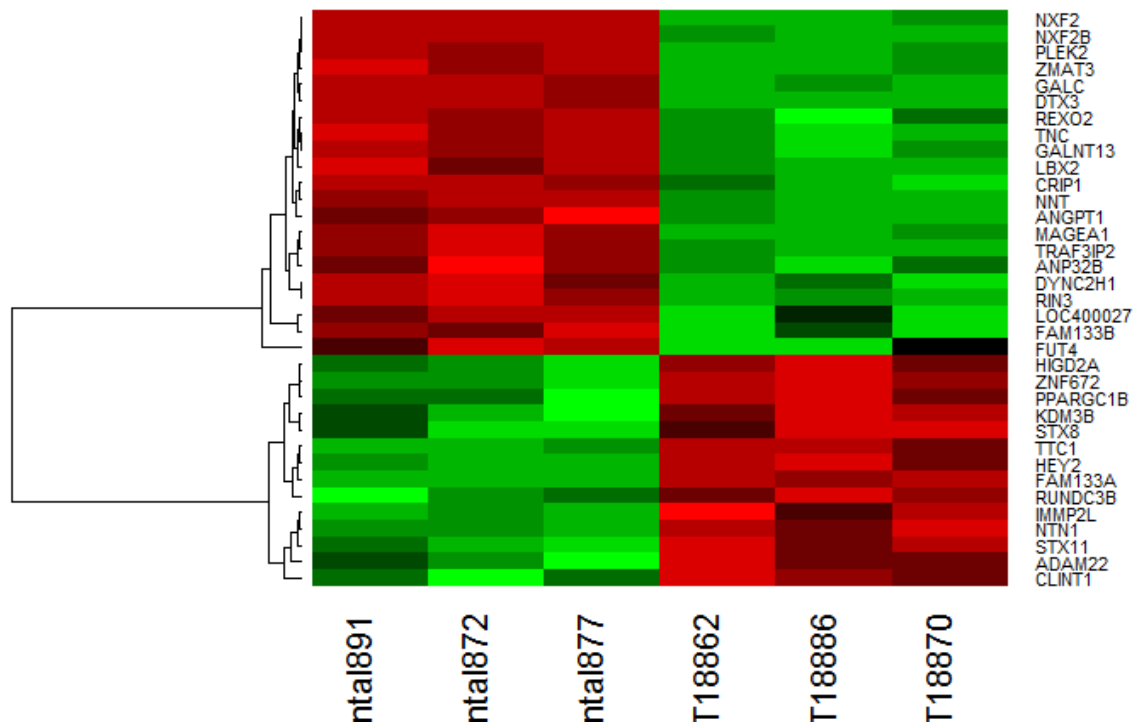

```
## Warning in heatmap.2(xe, col = greenred, scale = "row", distfun =
## function(x) {: Discrepancy: Colv is FALSE, while dendrogram is `row`.
## Omitting column dendrogram.

go=rownames(xe)[mm$rowInd] # keep the gene rows in the same order as
xenografts

heatmap.2(H1355.cb[go,], col=greenred,
margin=c(3,3),scale="row",Rowv=FALSE,Colv=FALSE,tracecol=NULL,key=FALSE)

## Warning in heatmap.2(H1355.cb[go, ], col = greenred, margin = c(3, 3),
## scale = "row", : Discrepancy: Rowv is FALSE, while dendrogram is `none`.
## Omitting row dendrogram.
```

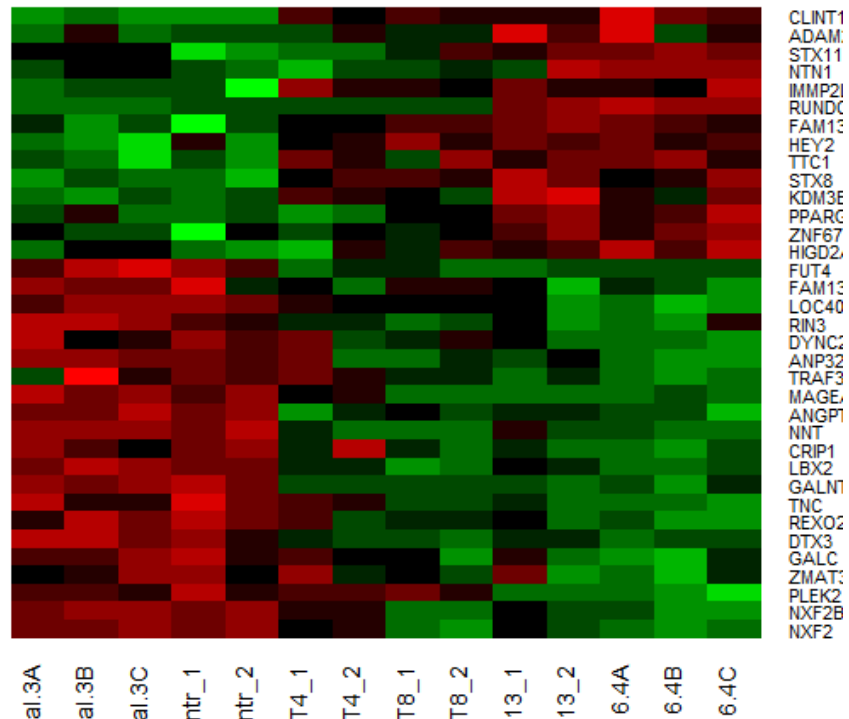

```
## Warning in heatmap.2(H1355.cb[go, ], col = greenred, margin = c(3, 3),
## scale = "row", : Discrepancy: Rowv is FALSE, while dendrogram is `none`.
## Omitting row dendrogram.
heatmap.2(H1299.cb[go,], col=greenred,
margin=c(3,3),scale="row",Rowv=FALSE,Colv=FALSE,tracecol=NULL,key=FALSE)
```

```
## Warning in heatmap.2(H1299.cb[go, ], col = greenred, margin = c(3, 3),
## scale = "row", : Discrepancy: Rowv is FALSE, while dendrogram is `none`.
## Omitting row dendrogram.
```

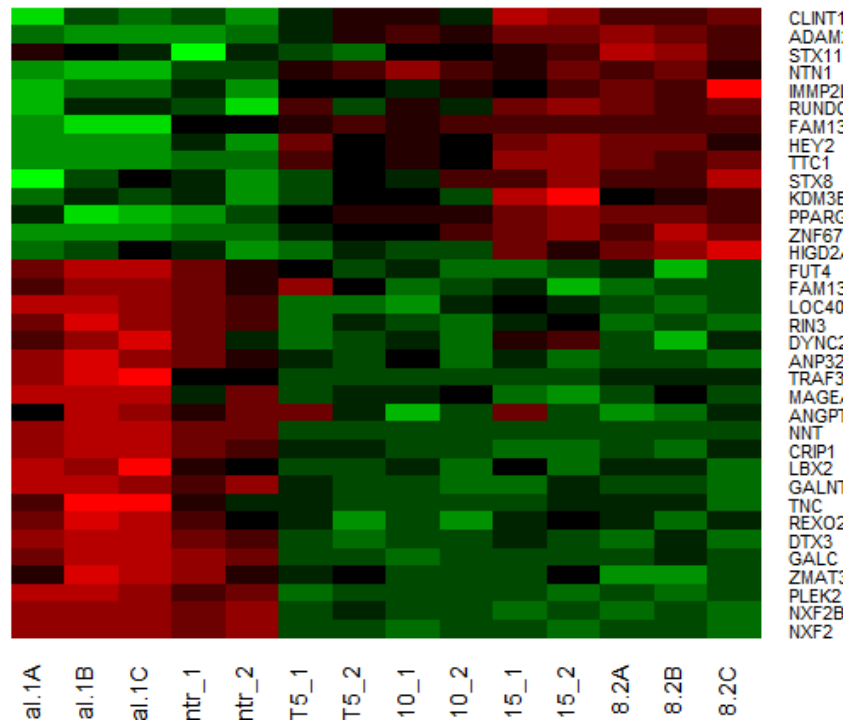

```
## Warning in heatmap.2(H1299.cb[go, ], col = greenred, margin = c(3, 3),
## scale = "row", : Discrepancy: Rowv is FALSE, while dendrogram is `none`.
## Omitting row dendrogram.
```

```
heatmap.2(xe[go,], col=greenred, scale="row",distfun=function(x) {as.dist(1-
cor(t(x)))},tracecol=NULL,Colv=FALSE,Rowv=FALSE,key=FALSE)
```

```
## Warning in heatmap.2(xe[go, ], col = greenred, scale = "row", distfun =
## function(x) {: Discrepancy: Rowv is FALSE, while dendrogram is `none`.
## Omitting row dendrogram.
```



```
## [43] TRUE TRUE
## [57] TRUE TRUE TRUE TRUE TRUE TRUE TRUE TRUE TRUE
```

```
dat.neoa <- dat.pati[, c(names(dat.pati[1:3]), dat.clin$id)]
id <- c(id.up.regulate, id.down.regulate)
```

```
dat.neoa <- dat.neoa[dat.neoa$gene.id %in% id, ]
row.names(dat.neoa) <- dat.neoa$gene.id
row.names(dat.neoa)
```

```
## [1] "284" "1396" "2526" "2581" "3371" "4100" "7265"
## [8] "8676" "9423" "9482" "9685" "10541" "10758" "23493"
## [15] "23530" "25996" "26499" "51780" "53616" "56001" "64393"
## [22] "79659" "79890" "79894" "83943" "85474" "114805" "133522"
## [29] "154661" "192286" "196403" "257415" "286499" "400027" "728343"
```

```
dat.neoa <- dat.neoa[, 4:68]
```

## 2. cluster plot and K-M curve recurrence free survival analysis

```
# cluster plot
```

```
hc.cell=hclust(dist(t(dat.neoa), method="maximum"))
plot(hc.cell)
```

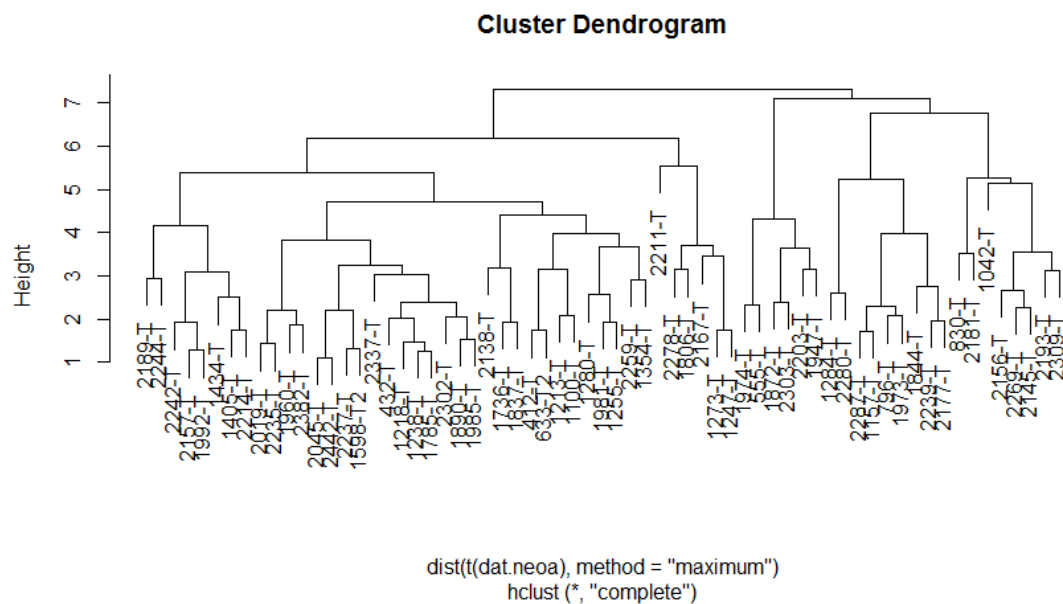

```
hc.cell$order
```

```
## [1] 30 52 32 3 50 12 15 29 37 38 10 22 4 19 5 8 53 18 21 2 45 1 7
## [24] 44 14 11 17 16 20 43 46 39 34 36 6 9 49 13 33 47 48 51 57 65 28 54
## [47] 42 55 27 61 25 58 40 63 56 59 64 31 41 62 60 26 35 23 24
```

```
dat.surv <- data.frame(id=hc.cell$labels[hc.cell$order], group=c(rep(1, 42),
rep(2, 23)))
```

```
dat.surv <- merge(dat.surv, dat.clin, by="id")
```

```

# K-M plot
kmpplot <- function(survival,groups, title.lab="",xlab="",ylab="",
                    survalllimit=c(60, 120), display=TRUE, cex.axis=1.5,
                    cex.lab=1.4, cex.main=1.5,
                    mar=c(5.1 , 5.3, 4.1, 1.1), sig=NULL, ...)
{
  require(survival)
  survival<-survival[!is.na(groups),]
  groups<-groups[!is.na(groups)]
  if(length(levels(factor(groups)))<2)
  { cat("error in kmpplot\n"); return() }
  logrank<-survdiff(survival ~ groups, ...)
  pv <- pchisq(logrank$chisq,1, lower.tail=F)

  summary_coxph <- summary(coxph(survival ~ groups, ...))
  ci <-summary_coxph$conf.int

  col=c("black", "red")
  if (display) {
    sfit= survfit(survival ~ groups, ...)

    plot(sfit, col=col, lty=1:2, main=title.lab, xlab=xlab,ylab=ylab,
mark.time=TRUE,mark=19,
        cex.axis=cex.axis, cex.lab=cex.lab, cex.main=cex.main, mar=mar, ...)

    ### add two vertical line represent 5 year and 10 year
#    sapply(survalllimit, function(x) abline(v=x, col="grey"))

    ### add results on plot
    stat=paste("n = ",length(groups)," ",pv.expr(pv) , "\n
HR=",format(ci[1],digits=3),
            " (95%CI," ,format(ci[3],digits=3),"-",
            format(ci[4],digits=3),")",sep="")
    x=min(survival[,1])+0.5*(max(survival[,1])-min(survival[,1]))
    text(x, 0.15 ,stat , cex=cex.lab)
  }
  return(list(group_table=table(groups),logrank.p=pv,
            hr=ci[1],hr.5=ci[3],hr.95=ci[4], n=length(groups),
            ebeta=summary_coxph$coef[1],
z=summary_coxph$coef[4],pr.z=summary_coxph$coef[5],
            groups=groups))
}

##Function to format pvalues in K-M plot
pv.expr <- function(x, digits = 2) {
  if (!x) return(0)
  exponent <- floor(log10(x))
  base <- round(x / 10^exponent, digits)
}

```



```

    ifelse(x > 0.0001,
          paste("p = ", base*(10^exponent), sep=""),
          paste("p = ", base, "E", exponent, sep=""))
}

survival <-
Surv(time=as.numeric(as.character(dat.surv$cancer.free.survival.month)),
      event=dat.surv$recurrence == 'Y')
survdifff(survival ~ dat.surv$group)

## Call:
## survdifff(formula = survival ~ dat.surv$group)
##
##              N Observed Expected (O-E)^2/E (O-E)^2/V
## dat.surv$group=1 42         20   28.56      2.56     10.5
## dat.surv$group=2 23         18    9.44      7.75     10.5
##
## Chisq= 10.5  on 1 degrees of freedom, p= 0.0012

kmpplot(survival, dat.surv$group,xlab="Cancer-free survival time
(months)",ylab="Recurrence-free survival")

```

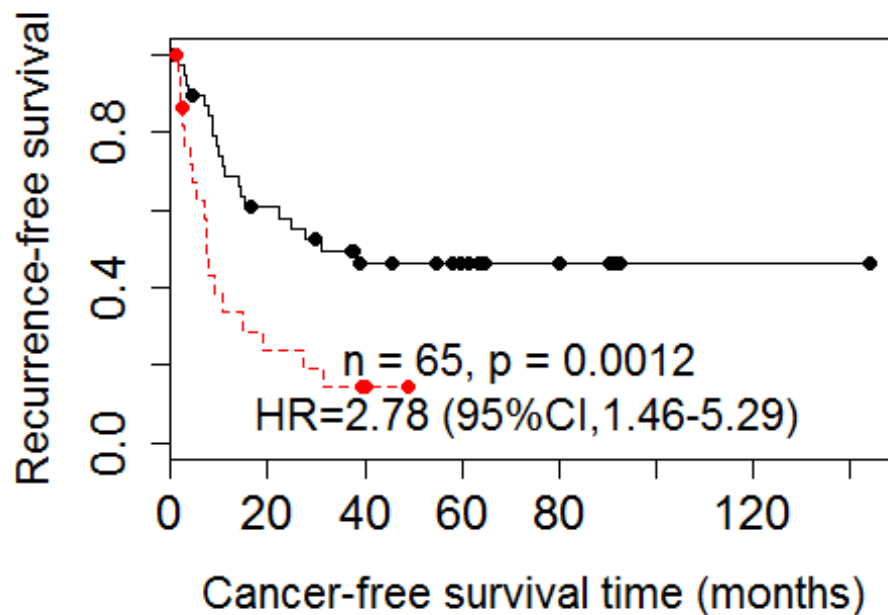

```

## $group_table
## groups
## 1 2
## 42 23

```

```
##
## $logrank.p
## [1] 0.001200184
##
## $hr
## [1] 2.776687
##
## $hr.5
## [1] 1.458712
##
## $hr.95
## [1] 5.28548
##
## $n
## [1] 65
##
## $ebeta
## [1] 1.021258
##
## $z
## [1] 3.109546
##
## $pr.z
## [1] 0.001873753
##
## $groups
## [1] 2 1 2 1 1 1 1 1 1 1 2 1 1 1 1 1 1 1 2 2 1 2 1 2 2 1 1 1 1 1 1 1 2 2 1
## [36] 1 2 2 1 2 2 1 1 1 1 2 1 1 1 2 1 2 2 1 2 2 1 1 1 1 1 2 1 2 2
```

### 3. Multivariate cox regression model

```
# data for 65 neoajuvant patients
load("dat65.RData")
head(dat65[,1:5])

##   gene.id n gene.symbol   2302-T   1238-T
## 1      1 2      A1BG  3.638638  2.605372
## 2      2 1      A2M 10.282485 11.270556
## 3      9 3      NAT1  3.201879  3.562783
## 4     10 1      NAT2  2.183924  2.484070
## 5     12 1  SERPINA3 10.435610  9.637462
## 6     13 1      AADAC  8.201044  3.566616

dim(dat65)

## [1] 19579    68

cli65=dat.clin
sig.id <- c(id.up.regulate, id.down.regulate)
sur65 <- dat65[dat65$gene.id %in% sig.id,]
row.names(sur65) <- sur65$gene.symbol
sur65 <- sur65[, -c(1:3)]
```

```
sur65 <- data.frame(t(sur65))
head(sur65)
```

```
##          ANGPT1    CRIP1    FUT4    GALC    TNC    MAGEA1    TTC1
## 2302-T 8.235965 10.73370 5.422461 7.486111 8.190325 2.634824 8.216957
## 1238-T 7.010597 11.35512 5.125421 7.166048 8.693179 2.708898 7.949370
## 2157-T 5.381803 10.67481 4.150018 6.272858 7.075845 2.896832 8.054993
## 2045-T 7.963517 11.84460 4.616963 6.794380 7.304523 2.662581 7.866941
## 2237-T 7.489364 12.19631 5.336181 7.265428 7.057829 2.768827 8.055649
## 2259-T 6.587808 12.08331 4.885976 6.528196 8.851127 3.828562 8.342618
##          STX11    NTN1    STX8    CLINT1    ANP32B    TRAF3IP2    HEY2
## 2302-T 8.806033 3.866315 7.807953 9.964402 11.97116 5.748529 4.538813
## 1238-T 8.990390 3.934511 8.164496 9.348762 11.80851 5.224289 6.463278
## 2157-T 7.266282 4.691052 7.932429 8.789924 12.60085 5.632375 4.672881
## 2045-T 9.024002 3.782765 7.853039 9.588817 11.81897 4.804227 5.344224
## 2237-T 8.642615 3.650787 7.420597 9.801010 11.90997 5.340369 6.014473
## 2259-T 6.644821 3.998293 7.765663 9.865428 11.74342 5.591911 8.132118
##          NNT    REXO2    PLEK2    KDM3B    ADAM22    NXF2    ZMAT3
## 2302-T 4.551442 10.626628 6.297819 7.387870 2.473813 2.654559 9.680279
## 1238-T 4.751584 10.565241 6.575559 7.741217 2.452605 2.820190 9.842212
## 2157-T 5.521030 10.975039 4.895468 7.082318 2.813311 2.837278 9.086257
## 2045-T 5.020791 9.837021 3.924777 7.125601 2.421299 2.879944 10.220259
## 2237-T 4.159578 10.301812 4.765241 7.175600 2.352307 2.790665 9.797409
## 2259-T 4.410768 10.430360 5.056644 8.019820 2.826604 2.525510 9.548210
##          DYNC2H1    RIN3    ZNF672    IMMP2L    LBX2    GALNT13    PPARGC1B
## 2302-T 4.191597 4.099950 8.520529 6.935128 3.066943 2.871684 3.334735
## 1238-T 5.409916 5.833676 8.051448 6.965085 3.123558 2.592927 4.696052
## 2157-T 4.979832 4.487548 8.851127 7.713463 3.093184 3.093184 4.472508
## 2045-T 5.705767 5.067450 7.956891 6.827816 2.898155 2.682759 5.601410
## 2237-T 5.783142 5.163301 8.259766 6.386431 2.781739 2.855904 5.743148
## 2259-T 7.879810 3.347565 8.959878 6.676347 3.190928 3.695353 4.047072
##          RUNDC3B    HIGD2A    DTX3    FAM133B    FAM133A    LOC400027    NXF2B
## 2302-T 4.391510 9.798051 5.078655 6.594635 2.419880 8.763619 2.653797
## 1238-T 3.793786 10.840024 6.443461 7.581591 3.507960 8.564467 2.406528
## 2157-T 2.499195 10.096499 5.335023 7.793973 2.466545 9.510188 2.593304
## 2045-T 5.482069 11.104236 5.138590 7.859911 2.350893 8.217731 2.534494
## 2237-T 3.759741 10.754040 6.324054 6.933605 3.132086 8.316771 2.501597
## 2259-T 6.139675 10.715144 6.606734 7.584588 2.957714 8.965241 2.644243
```

```
sur65$id <- row.names(sur65)
sur65 <- merge(sur65, cli65, by="id")
sur65$event <- ifelse(sur65$recurrence == "Y", 1, 0)
paste(names(sur65)[2:36], collapse = " + ")
```

```
## [1] "ANGPT1 + CRIP1 + FUT4 + GALC + TNC + MAGEA1 + TTC1 + STX11 + NTN1 +
STX8 + CLINT1 + ANP32B + TRAF3IP2 + HEY2 + NNT + REXO2 + PLEK2 + KDM3B +
ADAM22 + NXF2 + ZMAT3 + DYNC2H1 + RIN3 + ZNF672 + IMMP2L + LBX2 + GALNT13 +
PPARGC1B + RUNDC3B + HIGD2A + DTX3 + FAM133B + FAM133A + LOC400027 + NXF2B"
```

```
# multivariate cox regression model
```

```
fit65 <- coxph(Surv(cancer.free.survival.month, event)~ ANGPT1 + CRIP1 + FUT4
```

```
+ GALC + TNC + MAGEA1 + TTC1 + STX11 + NTN1 + STX8 + CLINT1 + ANP32B +
TRAF3IP2 + HEY2 + NNT + REXO2 + PLEK2 + KDM3B + ADAM22 + NXF2 + ZMAT3 +
DYNC2H1 + RIN3 + ZNF672 + IMMP2L + LBX2 + GALNT13 + PPARGC1B + RUNDC3B +
HIGD2A + DTX3 + FAM133B + FAM133A + LOC400027 + NXF2B, data=sur65)
```

```
sum65 <- summary(fit65)
coe65=sum65$coefficients
coe65
```

| ##           | coef       | exp(coef)   | se(coef)  | z          | Pr(> z )     |
|--------------|------------|-------------|-----------|------------|--------------|
| ## ANGPT1    | 0.2091745  | 1.23266002  | 0.3522183 | 0.5938772  | 0.5525942229 |
| ## CRIP1     | 0.4827728  | 1.62056161  | 0.4083533 | 1.1822427  | 0.2371093988 |
| ## FUT4      | 0.6953699  | 2.00445029  | 0.8489477 | 0.8190962  | 0.4127315352 |
| ## GALC      | 0.1018298  | 1.10719499  | 0.6486271 | 0.1569928  | 0.8752505211 |
| ## TNC       | 0.4542830  | 1.57504372  | 0.2696067 | 1.6849841  | 0.0919916316 |
| ## MAGEA1    | 0.3877544  | 1.47366785  | 0.2178626 | 1.7798117  | 0.0751067903 |
| ## TTC1      | -0.7462477 | 0.47414233  | 0.8774816 | -0.8504426 | 0.3950790600 |
| ## STX11     | -0.0624412 | 0.93946831  | 0.4083143 | -0.1529243 | 0.8784579357 |
| ## NTN1      | 0.4174976  | 1.51815770  | 0.4800938 | 0.8696166  | 0.3845099402 |
| ## STX8      | -2.1243707 | 0.11950815  | 0.8603591 | -2.4691674 | 0.0135427840 |
| ## CLINT1    | -2.9858164 | 0.05049826  | 1.3702253 | -2.1790697 | 0.0293264880 |
| ## ANP32B    | -0.8004983 | 0.44910512  | 0.7571715 | -1.0572219 | 0.2904103310 |
| ## TRAF3IP2  | 1.3593645  | 3.89371789  | 0.8955198 | 1.5179613  | 0.1290241587 |
| ## HEY2      | -0.1132994 | 0.89288327  | 0.2281820 | -0.4965310 | 0.6195198115 |
| ## NNT       | 3.0160368  | 20.41024063 | 0.8867630 | 3.4011757  | 0.0006709668 |
| ## REXO2     | 0.8232530  | 2.27789773  | 1.0772530 | 0.7642150  | 0.4447391043 |
| ## PLEK2     | -0.0854132 | 0.91813283  | 0.2689104 | -0.3176270 | 0.7507679273 |
| ## KDM3B     | 2.3300661  | 10.27862073 | 1.0422492 | 2.2356132  | 0.0253771209 |
| ## ADAM22    | 1.8088556  | 6.10345840  | 1.2200918 | 1.4825569  | 0.1381921728 |
| ## NXF2      | -1.9577895 | 0.14117013  | 1.3088808 | -1.4957738 | 0.1347126236 |
| ## ZMAT3     | -0.2423971 | 0.78474446  | 0.8924421 | -0.2716111 | 0.7859210966 |
| ## DYNC2H1   | -0.7245371 | 0.48454882  | 0.4513348 | -1.6053205 | 0.1084232849 |
| ## RIN3      | 0.1752646  | 1.19156148  | 0.4063743 | 0.4312886  | 0.6662585233 |
| ## ZNF672    | -1.7224168 | 0.17863391  | 1.0290374 | -1.6738135 | 0.0941672569 |
| ## IMMP2L    | 0.6351963  | 1.88739254  | 0.7552601 | 0.8410299  | 0.4003311966 |
| ## LBX2      | 0.6945857  | 2.00287903  | 0.3475644 | 1.9984375  | 0.0456692455 |
| ## GALNT13   | 0.5186821  | 1.67981236  | 0.3777974 | 1.3729106  | 0.1697801307 |
| ## PPARGC1B  | -0.3403402 | 0.71152822  | 0.3936462 | -0.8645839 | 0.3872672093 |
| ## RUNDC3B   | -0.1737039 | 0.84054572  | 0.3701324 | -0.4693021 | 0.6388537108 |
| ## HIGD2A    | -0.1515406 | 0.85938303  | 1.1451527 | -0.1323322 | 0.8947215570 |
| ## DTX3      | 0.8800273  | 2.41096560  | 0.3218440 | 2.7343286  | 0.0062507638 |
| ## FAM133B   | -1.6762593 | 0.18707245  | 1.3213149 | -1.2686297 | 0.2045731611 |
| ## FAM133A   | 0.1851519  | 1.20340119  | 0.2420717 | 0.7648639  | 0.4443526181 |
| ## LOC400027 | -0.3161092 | 0.72897986  | 0.5113653 | -0.6181670 | 0.5364652793 |
| ## NXF2B     | 2.7053611  | 14.95971778 | 1.6524065 | 1.6372249  | 0.1015834781 |

```
dm=coe65[as.character(up$gene.symbol),]
dim(dm)
```

```
## [1] 14 5
```

## 14 up regulated genes

```
plot(dm[,2], -log(dm[,5]), type="p", pch=19, xlab="Hazard Ratio", ylab="-log(p.value)")
abline(h=1.25, v=0, lty=2)
```

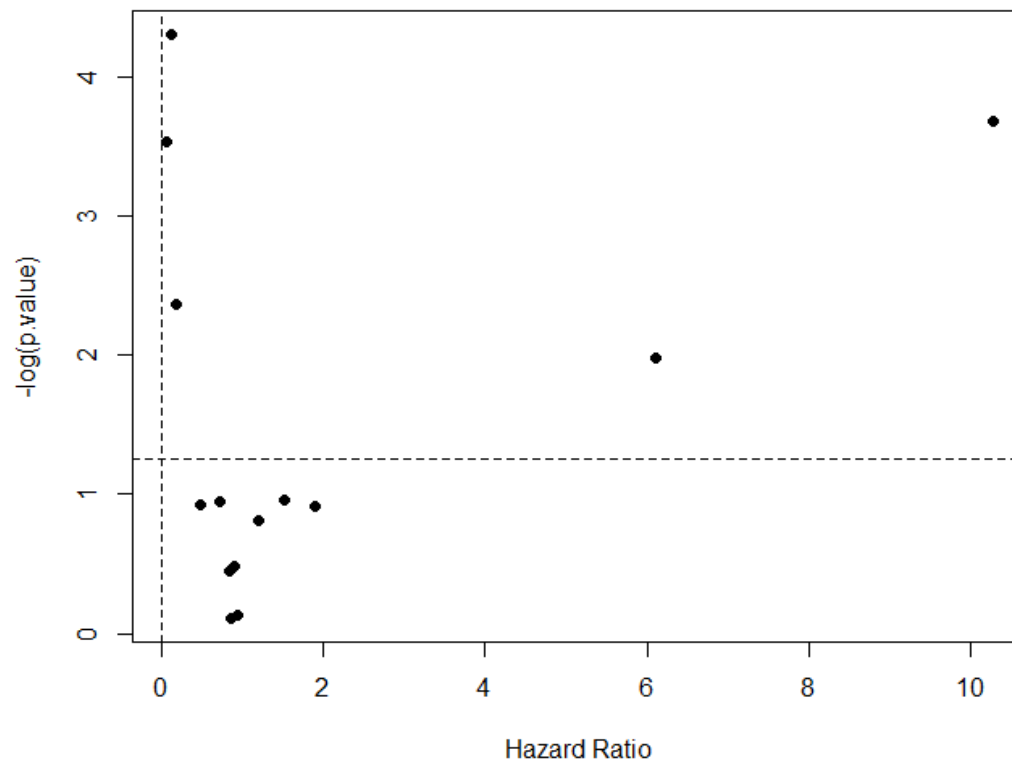

```
dat.surv$neoadj <- ifelse(dat.surv$Neoadjuvant.Drugs %in% c("Cisplatin", "Docetaxel", "Carboplatin Paclitaxel", "Carboplatin Docetaxel", "Cisplatin"), 1, 0)
```

```
table(dat.surv$neoadj)
```

```
##
```

```
## 0 1
```

```
## 10 55
```

```
dat.surv$path[grepl("IA", dat.surv$pathology)] <- "I"
dat.surv$path[grepl("IB", dat.surv$pathology)] <- "I"
dat.surv$path[grepl("IIA", dat.surv$pathology)] <- "II"
dat.surv$path[grepl("IIB", dat.surv$pathology)] <- "II"
dat.surv$path[grepl("IIIA", dat.surv$pathology)] <- "III"
dat.surv$path[grepl("IIIB", dat.surv$pathology)] <- "III"
dat.surv$path[grepl("IV", dat.surv$pathology)] <- "IV"
```

```

coxph(Surv(cancer.free.survival.month, recurrence == 'Y') ~ group,
data=dat.surv)

## Call:
## coxph(formula = Surv(cancer.free.survival.month, recurrence ==
##      "Y") ~ group, data = dat.surv)
##
##
##      coef exp(coef) se(coef)      z      p
## group 1.021      2.777      0.328 3.11 0.0019
##
## Likelihood ratio test=9.15  on 1 df, p=0.00249
## n= 65, number of events= 38

cox.fit <- coxph(Surv(cancer.free.survival.month, recurrence == 'Y') ~ group
+ histology + age + smoke + Gender + Race + Adjuvant.Therapy + neoadj + path,
data=dat.surv)

cox.fit

## Call:
## coxph(formula = Surv(cancer.free.survival.month, recurrence ==
##      "Y") ~ group + histology + age + smoke + Gender + Race +
##      Adjuvant.Therapy + neoadj + path, data = dat.surv)
##
##
##
##      coef exp(coef) se(coef)      z      p
## group      1.6292    5.0997   0.4858   3.35 0.0008
## histologyOther      0.3710    1.4492   0.4745   0.78 0.4343
## histologySquamous    -0.2292    0.7952   0.4969  -0.46 0.6446
## age      0.0222    1.0224   0.0251   0.88 0.3765
## smokeY    -0.9275    0.3955   0.6676  -1.39 0.1647
## GenderM    -0.2108    0.8099   0.4312  -0.49 0.6249
## RaceAsian or Pacific Islander -0.2788    0.7567   1.5221  -0.18 0.8547
## RaceCaucasian    -0.8713    0.4184   0.8005  -1.09 0.2764
## RaceHispanic    -0.1321    0.8762   1.2877  -0.10 0.9183
## Adjuvant.TherapyY    -1.0292    0.3573   0.4962  -2.07 0.0380
## neoadj      0.5252    1.6909   0.5182   1.01 0.3107
## pathII    -0.2370    0.7890   0.5893  -0.40 0.6875
## pathIII     1.0031    2.7268   0.4973   2.02 0.0437
## pathIV     0.9530    2.5935   0.6674   1.43 0.1533
##
## Likelihood ratio test=23.2  on 14 df, p=0.0566
## n= 65, number of events= 38

```
